# Supplementary material for: A novel silver nanoparticle embedded mesoporous polyaniline (mPANI/Ag) nanocomposite as a recyclable catalyst in the acylation of amines and alcohols under solvent free conditions
Source: Royal Society of Chemistry journal article supplement (doi:10.1039/c4ra06182a), 2014-01-01
Supplement: c4ra06182a1.pdf [file c4ra06182a1.pdf]

## Supporting Information

### **A novel silver nanoparticle embedded mesoporous polyaniline (mPANI/Ag) nanocomposite as recyclable catalyst in the acylation of amines and alcohols under solvent free condition**

Usha Mandi,<sup>a †</sup> Anupam Singha Roy,<sup>a,c †</sup> Biplab Banerjee<sup>b †</sup> and Sk. Manirul Islam<sup>a,\*</sup>

<sup>a</sup>*Department of Chemistry, University of Kalyani, Kalyani, Nadia, 741235, W.B., India*

<sup>b</sup>*Department of Material Science, Indian Association for the Cultivation of Science, Kolkata - 700032, India*

<sup>c</sup>*Department of Chemical Sciences, Indian Institute of Science Education and Research (IISER) Kolkata, Mohanpur - 741246, India*

†These authors contributed equally to this manuscript.

---

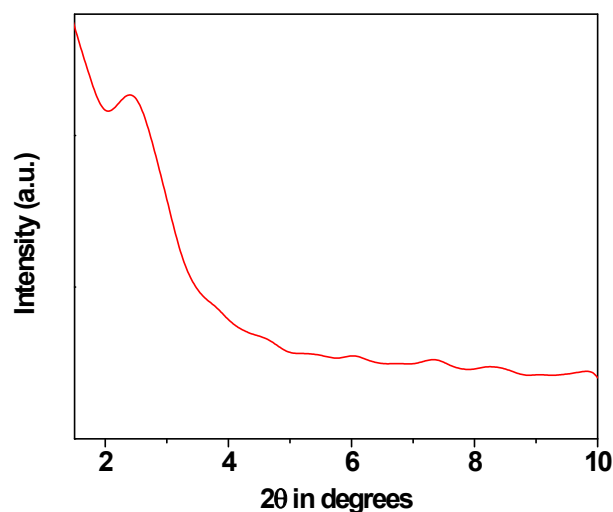

**Figure S1** Small angle XRD of mPANI/Ag after first catalytic run.

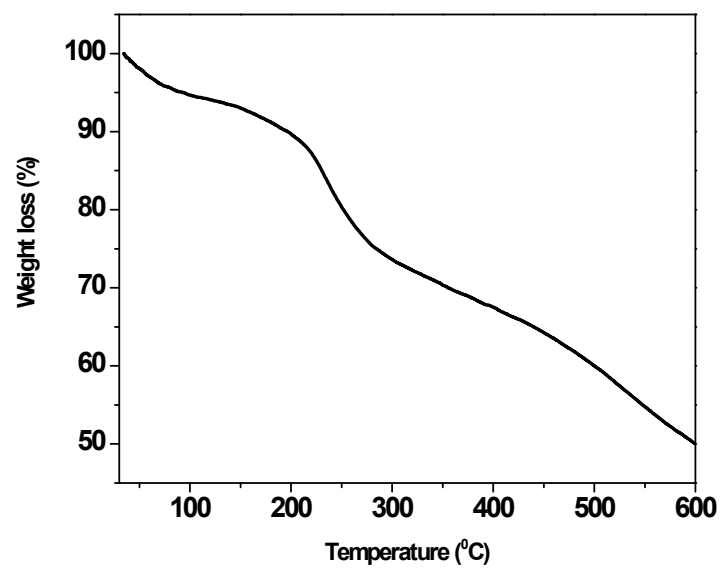

**Figure S2** TGA plot of mesoporous mPANI/Ag
